# Supplementary material
Source: PubMed Central journal article supplement (PMC4032521)

**Supplementary Figure 1.** Raw data and fitted curves of the DR response at relative ages at onset of DR (PASM with 0.02% w/v Glucose) (A) for the autophagy deficient mutants ( $\Delta PaUth1$ ,  $\Delta PaAtg8$ ,  $\Delta PaPspA$ , and  $\Delta PaAtg1$ ), and the wild-type parental strain *s* (in order of appearance from left to right) combined, and separately for each of the strains: (B)  $\Delta PaUth1$ , (C)  $\Delta PaAtg8$ , (D)  $\Delta PaPspA$ , (E)  $\Delta PaAtg1$  and (F) the wild-type parental strain *s* (growth experiments were stopped after 90 days, p-values fitted curves < 0.001).

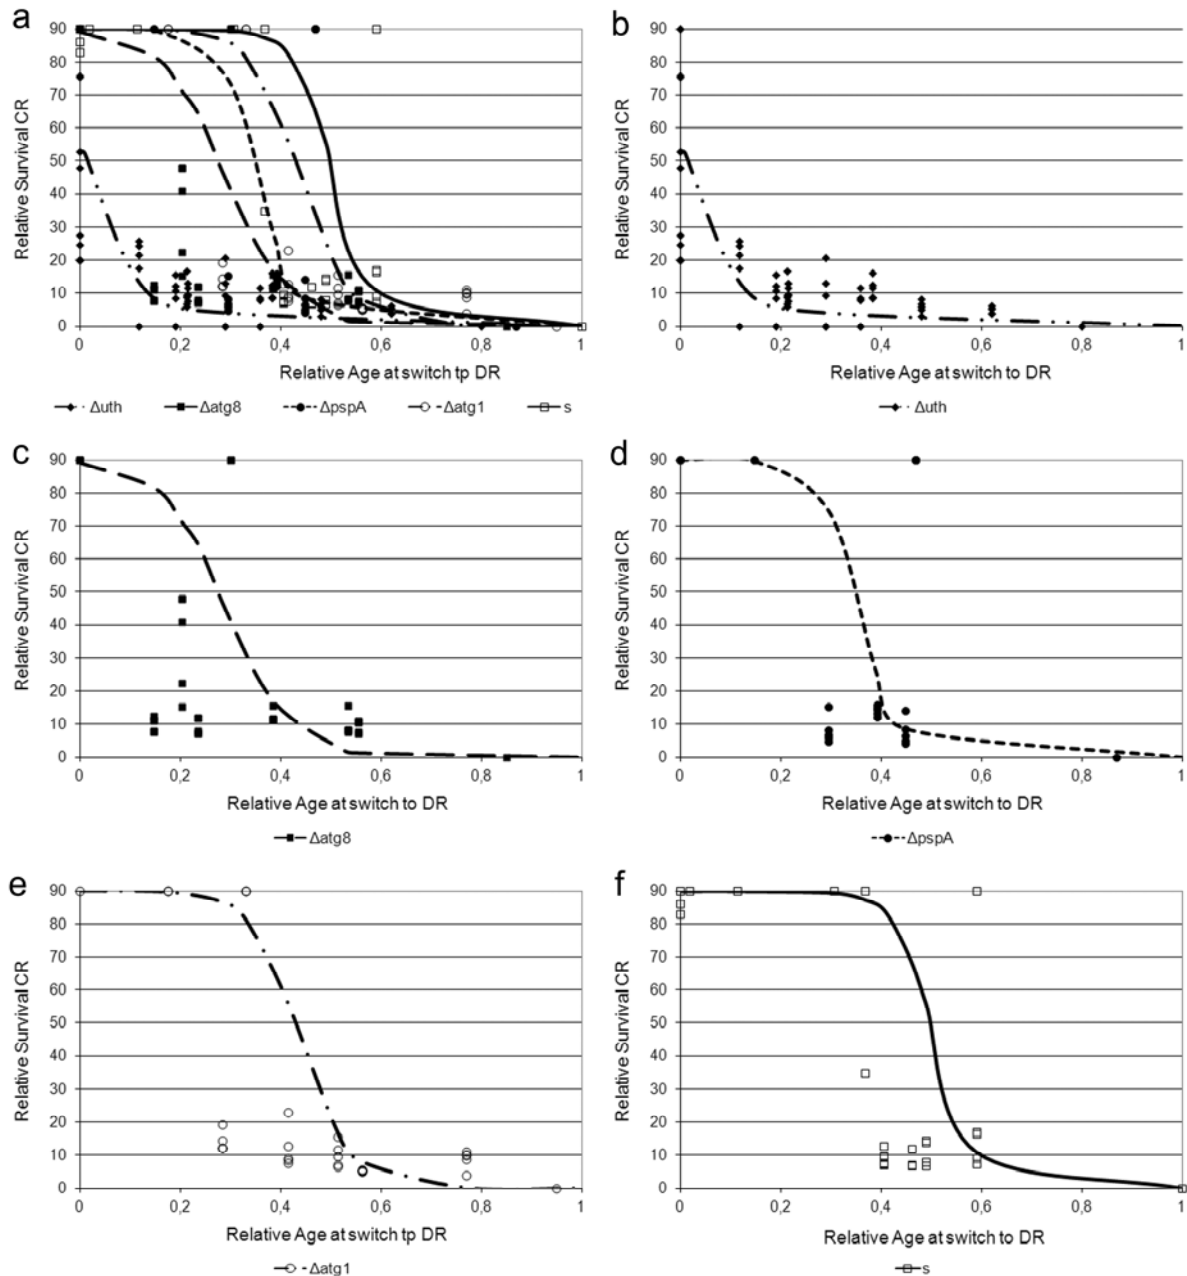

Supplement: rstb20130447supp1.pdf [file rstb20130447supp1.pdf]
